# Supplementary material
Source: ML conference proceedings conference paper supplement (https://openaccess.thecvf.com/content/ACCV2024/html/Kanagalingam_Feature_Generator_for_ACCV_2024_paper.html)
Supplement: Supplementary file 1 [file Kanagalingam_Feature_Generator_for_ACCV_2024_supplemental.pdf]

Table 1: Class Descriptions

| Class Name       | Description                                                                                                                                                                                                                                         |
|------------------|-----------------------------------------------------------------------------------------------------------------------------------------------------------------------------------------------------------------------------------------------------|
| Unicycle         | The unicycle is a single-wheeled vehicle with a seat and pedals. It has a circular shape with a tall central wheel. The unicycle features a handlebar for balance and maneuverability.                                                              |
| Hotdog           | The hotdog is a long, cylindrical-shaped food item. It typically consists of a sausage wrapped in a soft bun. It is often topped with condiments such as ketchup, mustard, and onions.                                                              |
| Photocopier      | The photocopier is a machine used for duplicating documents. It has a rectangular shape with a flat glass surface. The photocopier features buttons and controls for adjusting settings.                                                            |
| Miniature Poodle | The miniature poodle is a small-sized breed of dog. It has a fluffy and curly coat that comes in various colors. The miniature poodle has a distinct round face and expressive eyes.                                                                |
| Walker Hound     | The Walker hound is a breed of dog known for its hunting abilities. It has a slim and athletic body with short fur. The Walker hound features long ears and a strong sense of smell.                                                                |
| Tibetan Mastiff  | The Tibetan Mastiff is a large and powerful breed of dog. It has a muscular build and a thick double coat. The Tibetan Mastiff has a broad head and a bushy tail.                                                                                   |
| Parallel Bars    | The parallel bars are gymnastics equipment used for balancing and strength exercises. They consist of two horizontal bars set parallel to each other at different heights. The parallel bars provide support for various acrobatic movements.       |
| Tile Roof        | The tile roof is a type of roofing made of clay or concrete tiles. It has a sloping shape, and the tiles overlap to create a waterproof barrier. The tile roof is durable and provides insulation against heat and cold.                            |
| Dugong           | The dugong, also known as the "sea cow," is a marine mammal. It has a large, cylindrical body and a rounded tail. The dugong features paddle-like flippers and a snout with bristly whiskers.                                                       |
| Chime            | The chime is a musical instrument consisting of suspended metal tubes or rods. It has a vertical elongated shape with different lengths of tubes. When struck, the chime produces resonant and harmonious tones.                                    |
| Drawer           | The drawer is a storage compartment typically found in furniture like desks and dressers. It has a rectangular shape with a handle or knob for pulling. The drawer slides in and out of a larger structure for easy access to stored items.         |
| Beer Bottle      | The beer bottle is a container used for storing and serving beer. It has a cylindrical shape with a narrow neck and a cap or a crown seal. The beer bottle may feature labels or embossed designs for branding.                                     |
| Aircraft Carrier | The aircraft carrier is a large warship used for deploying and recovering aircraft. It has a flat elongated deck with a superstructure and multiple flight decks. The aircraft carrier features a vast hangar for storing and maintaining aircraft. |
